CORRECTION

# Correction: Advances in monitoring glaciological processes in Kalallit Nunaat (Greenland) over the past decades

Dominik Fahrner, Ginny Catania, Michael G. Shahin, Dougal D. Hansen, Karina Löffler, Jakob Abermann

The ethnic group Kalaallit is misspelled in the article title. The correct title is: Advances in monitoring glaciological processes in Kalaallit Nunaat (Greenland) over the past decades. The correct citation is: Fahrner D, Catania G, Shahin MG, Hansen DD, Löffler K, Abermann J (2024) Advances in monitoring glaciological processes in Kalaallit Nunaat (Greenland) over the past decades. PLOS Clim 3(4): e0000379. <https://doi.org/10.1371/journal.pclm.0000379>

There are number of errors in the caption for [Figs 3](#) and [5](#). Please see the complete, correct [Figs 3](#) and [5](#) captions here.

In the Coordination and inclusivity of science subsection of the Research in Greenland: Best practices, there is an error in the first sentence of the first paragraph. The correct sentence is: The latest Greenland Research Strategy report states that future research in Greenland should be conducted in cooperation with Greenlandic research organizations such as the Greenland Institute of Natural Resources, Asiaq Greenland Survey or through research facilitators like Arctic Hub [279].

In the Conclusion, the references are omitted from the sentence of the fourth paragraph. The correct sentence is: This review is not intended to be an exhaustive review of all work in Greenland given the scope of the paper, with some omissions being the Greenland Ecosystems

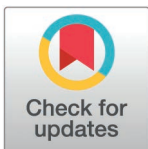

**OPEN ACCESS**

**Citation:** Fahrner D, Catania G, Shahin MG, Hansen DD, Löffler K, Abermann J. (2025) Correction: Advances in monitoring glaciological processes in Kalallit Nunaat (Greenland) over the past decades. PLOS Clim 4(3): e0000596. <https://doi.org/10.1371/journal.pclm.0000596>

**Published:** March 27, 2025

**Copyright:** © 2025 Fahrner et al. This is an open access article distributed under the terms of the [Creative Commons Attribution License](https://creativecommons.org/licenses/by/4.0/), which permits unrestricted use, distribution, and reproduction in any medium, provided the original author and source are credited.

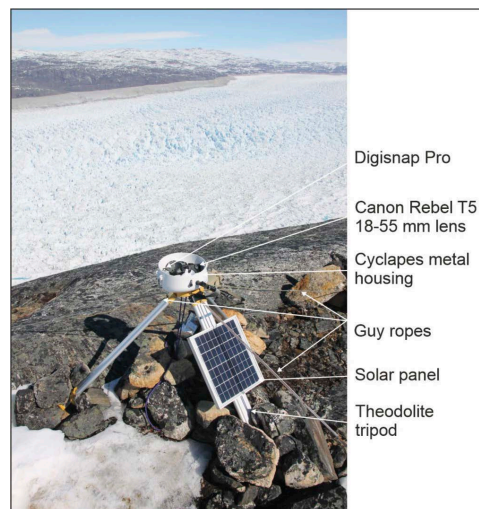

**Fig 3. Time lapse camera setup at Narsap Sermia, SW Greenland, to monitor icebergalving, ice velocities and terminus dynamics (Joint project between University of Liverpool and Asiaq Greenland Survey; image credit: Dominik Fahrner).**

<https://doi.org/10.1371/journal.pclm.0000596.g001>

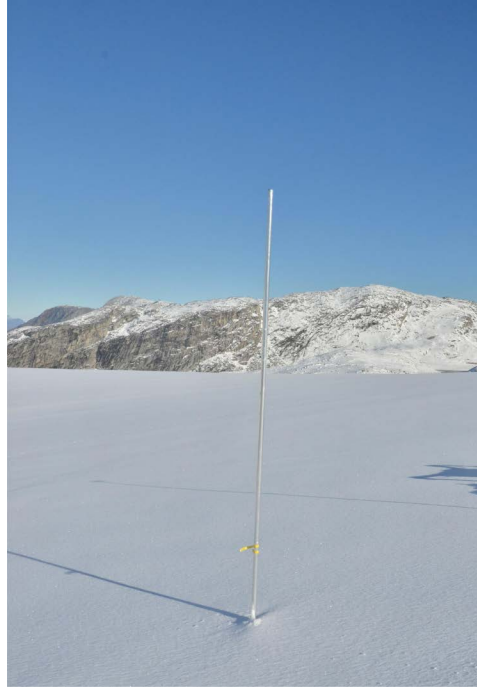

**Fig 5.** Example of an ablation stake installed at Qassinnguit Sermiat in Kobbefjord, SW Greenland, operated by Asiaq Greenland Survey within the interdisciplinary Greenland Ecosystems Monitoring (GEM) programme (image credit: Jakob Abermann).

<https://doi.org/10.1371/journal.pclm.0000596.g002>

Monitoring (GEM; <https://g-e-m.dk>), the Snow impurity and Glacial Microbe effects on abrupt warming in the Arctic (SIGMA; e.g., Aoki et al., 2014), and the Greenland Climate Network (GC-Net; e.g., Vandecrux et al., 2023).

The references are: Aoki T, Matoba S, Uetake J, Takeuchi N, Motoyama H. Field activities of the “Snow Impurity and Glacial Microbe effects on abrupt warming in the Arctic” (SIGMA) Project in Greenland in 2011-2013. *Bull Glaciol Res.* 2014;32:3–20.

Vandecrux B, Box JE, Ahlstrøm AP, Andersen SB, Bayou N, Colgan WT, et al. The historical Greenland Climate Network (GC-Net) curated and augmented level-1 dataset. *Earth Syst Sci Data.* 2023;15(12):5467–89. <https://doi.org/10.5194/essd-15-5467-2023>

## Reference

1. Fahrner D, Catania G, Shahin MG, Hansen DD, Löffler K, Abermann J. Advances in monitoring glaciological processes in Kalallit Nunaat (Greenland) over the past decades. *PLOS Clim.* 2024;3(4): e0000379. <https://doi.org/10.1371/journal.pclm.0000379>
